# Supplementary material for: FluxMap: A VANTED add-on for the visual exploration of flux distributions in biological networks
Source: PubMed Central journal article supplement (PMC3403919; doi:10.1186/1752-0509-6-33), 2012-05-01
Supplement: 1752-0509-6-33-S1.pdf [file 1752-0509-6-33-S1.pdf]

Microsoft Excel - Flux\_OxygenDepletion1

Frage hier eingeben

O85

|    | A                                                                                                   | B           | C                                      | D              | E              | F              | G              |
|----|-----------------------------------------------------------------------------------------------------|-------------|----------------------------------------|----------------|----------------|----------------|----------------|
| 1  | <b>Supplementary material S7: Flux distributions for all reactions of the phaenotyp. Flux units</b> |             |                                        |                |                |                |                |
| 2  |                                                                                                     |             |                                        |                |                |                |                |
| 3  | <b>Reaction</b>                                                                                     | <b>comp</b> | <b>stoichiometry</b>                   | <b>Phase 1</b> | <b>Phase 2</b> | <b>Phase 3</b> | <b>Phase 4</b> |
| 4  | sucrose transporter                                                                                 | cm          | sucrose_ex + H_ext ==> sucrose_c       | 8,0000         | 8,0000         | 8,0000         | 8,0000         |
| 5  | AA transporter (asparagine)                                                                         | cm          | Asn_ex + H_ext ==> Asn_c               | 0,1610         | 0,5119         | 1,0680         | 0,5095         |
| 6  | AA transporter (glutamine)                                                                          | cm          | Gln_ex + H_ext ==> Gln_c               | 0,7475         | 0,4900         | 0,1512         | 0,9890         |
| 7  | O2-diffusion                                                                                        | cm          | O2_ex ==> O2_c                         | 0,0000         | 1,0000         | 4,0000         | 8,5000         |
| 8  | pyruvate transporter (simpl.)                                                                       | m           | Pyr_c <==> Pyr_m                       | 0,0000         | 0,3343         | 1,5570         | 2,7067         |
| 9  | glutamate/aspartate transporter                                                                     | m           | Glu_c + Asp_m <==> Glu_m + Asp_c       | 0,5901         | 0,5477         | 0,2228         | 0,3308         |
| 10 | OAA/malate transporter                                                                              | m           | OAA_c + Mal_m <==> OAA_m + Mal_c       | 0,6431         | 0,1898         | -0,5387        | -1,3999        |
| 11 | OAA/2OG transporter                                                                                 | m           | OAA_c + 2OG_m <==> OAA_m + 2OG_c       | 0,4868         | 0,3342         | 0,0055         | -0,5988        |
| 12 | OAA/succinate transporter                                                                           | m           | OAA_c + Succ_m <==> OAA_m + Succ_c     | 0,3930         | 0,1600         | -0,2403        | -0,7772        |
| 13 | OAA/citrate transporter                                                                             | m           | OAA_c + Cit_m <==> OAA_m + Cit_c       | 0,4007         | 0,1930         | -0,1666        | -0,6611        |
| 14 | OAA/aspartate transporter                                                                           | m           | OAA_c + Asp_m <==> OAA_m + Asp_c       | -1,3848        | -1,3831        | -0,8247        | -0,2714        |
| 15 | succinate/P transporter                                                                             | m           | P_c + Succ_m <==> P_m + Succ_c         | -0,1250        | -0,0149        | 0,1492         | 0,3114         |
| 16 | succinate/malate transporter                                                                        | m           | Succ_c + Mal_m <==> Succ_m + Mal_c     | 0,2501         | 0,0298         | -0,2985        | -0,6227        |
| 17 | malate/P transporter                                                                                | m           | P_c + Mal_m <==> P_m + Mal_c           | 0,1250         | 0,0149         | -0,1492        | -0,3114        |
| 18 | 2OG/citrate transporter                                                                             | m           | Cit_c + 2OG_m <==> Cit_m + 2OG_c       | 0,0861         | 0,1412         | 0,1721         | 0,0623         |
| 19 | 2OG/succinate transporter                                                                           | m           | 2OG_c + Succ_m <==> 2OG_m + Succ_c     | -0,0938        | -0,1742        | -0,2458        | -0,1784        |
| 20 | malate/citrate transporter                                                                          | m           | Cit_c + Mal_m <==> Cit_m + Mal_c       | 0,2424         | -0,0032        | -0,3721        | -0,7388        |
| 21 | succinate/citrate transporter                                                                       | m           | Cit_c + Succ_m <==> Cit_m + Succ_c     | -0,0077        | -0,0330        | -0,0737        | -0,1161        |
| 22 | phosphate transporter                                                                               | m           | P_c <==> P_m                           | -11,9191       | -10,2021       | -4,1809        | 5,5605         |
| 23 | ATP/ADP transporter                                                                                 | m           | ATP_c + ADP_m <==> ATP_m + ADP_c       | 11,9191        | 10,2021        | 4,1809         | -5,5605        |
| 24 | GABA/glutamate transporter                                                                          | m           | Glu_c + Gaba_m <==> Glu_m + Gaba_c     | 0,0000         | 0,0000         | 0,0000         | 0,0000         |
| 25 | CO2-diffusion                                                                                       | m           | CO2_c <==> CO2_m                       | 0,1082         | -0,5493        | -3,6740        | -7,6977        |
| 26 | O2-diffusion                                                                                        | m           | O2_c <==> O2_m                         | 0,0000         | 1,0000         | 4,0000         | 8,5000         |
| 27 | NH3-diffusion                                                                                       | m           | NH3_c <==> NH3_m                       | -1,3564        | -1,3518        | -0,7866        | -0,2246        |
| 28 | ADP-glucose transporter (AMP)                                                                       | p           | ADPglc_c + ADP_p <==> ADPglc_p + ADP_c | 6,5464         | 7,2183         | 8,7847         | 10,0651        |
| 29 | G1P transporter                                                                                     | p           | P_c + G1P_p <==> P_p + G1P_c           | -2,3214        | -1,8469        | -0,8637        | -0,6758        |
| 30 | phosphate transporter                                                                               | p           | P_c <==> P_p                           | 2,9574         | 2,9513         | 2,3583         | 0,5633         |
| 31 | ATP/ADP transporter                                                                                 | p           | ATP_c + ADP_p <==> ATP_p + ADP_c       | -2,9574        | -2,9513        | -2,3583        | -0,5633        |
| 32 | glucose transporter                                                                                 | p           | Glc_c <==> Glc_p                       | 0,0000         | 0,0000         | 0,0000         | 0,0000         |
| 33 | triosephosphat/P translocator (TPT)                                                                 | p           | P_c + GAP_p <==> P_p + GAP_c           | 1,3976         | 1,0658         | -0,3111        | -1,8598        |
| 34 | triosephosphat/P translocator (TPT)                                                                 | p           | P_c + DHAP_p <==> P_p + DHAP_c         | -0,6130        | -0,6523        | -1,0052        | -1,3620        |

Flüsse\_Oxygendepletion / Tabelle1

Bereit

Figure 1: Take flux raw data

Microsoft Excel - eva\_flux\_mass

Frage hier eingeben

R142

|    | A                                 | B                      | C                      | D                      | E                      | F                        | G                      | H     |
|----|-----------------------------------|------------------------|------------------------|------------------------|------------------------|--------------------------|------------------------|-------|
| 1  |                                   |                        |                        | <b>Internal Info</b>   |                        |                          |                        |       |
| 2  |                                   |                        |                        | <b>v1.0F</b>           |                        |                          |                        |       |
| 3  | <b>Experiment</b>                 |                        |                        |                        |                        | <b>Substance weights</b> |                        |       |
| 4  | Start of Experiment (Date)        | 11.10.10               |                        |                        |                        | name                     |                        |       |
| 5  | Remark                            |                        |                        |                        |                        | weight                   |                        |       |
| 6  | Experiment Name (ID)              | Barley Oxygenic Phases |                        |                        |                        |                          |                        |       |
| 7  | Coordinator                       | Eva Grafahrend-Belau   |                        |                        |                        |                          |                        |       |
| 8  |                                   |                        |                        |                        |                        |                          |                        |       |
| 9  |                                   |                        |                        |                        |                        |                          |                        |       |
| 10 |                                   |                        |                        |                        |                        |                          |                        |       |
| 11 | <b>Conditions</b>                 | 1                      | 2                      | 3                      | 4                      | 5                        | 6                      |       |
| 12 | Species                           | <i>Hordeum vulgare</i> | <i>Hordeum vulgare</i> | <i>Hordeum vulgare</i> | <i>Hordeum vulgare</i> | <i>Hordeum vulgare</i>   | <i>Hordeum vulgare</i> |       |
| 13 |                                   |                        |                        |                        |                        |                          |                        |       |
| 14 | Genotype                          | <b>Phase 1</b>         | <b>Phase 2</b>         | <b>Phase 3</b>         | <b>Phase 4</b>         | <b>LO</b>                | <b>Phase 5</b>         |       |
| 15 |                                   |                        |                        |                        |                        |                          |                        |       |
| 16 | Treatment                         | none                   | none                   | none                   | none                   | none                     | none                   |       |
| 17 |                                   |                        |                        |                        |                        |                          |                        |       |
| 18 |                                   |                        |                        |                        |                        |                          |                        |       |
| 19 |                                   |                        |                        |                        |                        |                          |                        |       |
| 20 | <b>Measurements</b>               |                        | <b>Conditions</b>      | 1                      | quality                | 2                        | quality                | 3     |
| 21 |                                   |                        | <b>Time</b>            |                        |                        |                          |                        |       |
| 22 |                                   |                        | <b>Unit (Time)</b>     |                        |                        |                          |                        |       |
| 23 | <b>Reaction</b>                   | <b>Reactionname</b>    | <b>Unit</b>            | flux                   |                        | flux                     |                        | flux  |
| 24 | OAA_c + Asp_m <=> OAA_m + Asp_c   | R752                   |                        | -1,38                  | 416,36                 | -1,38                    | 416,66                 | -0,82 |
| 25 | P_c + Succ_m <=> P_m + Succ_c     | R755                   |                        | -0,13                  | 888,89                 | -0,01                    | 985,32                 | 0,15  |
| 26 | Succ_c + Mal_m <=> Succ_m + Mal_c | R756                   |                        | 0,25                   | 799,94                 | 0,03                     | 971,06                 | -0,30 |
| 27 | P_c + Mal_m <=> P_m + Mal_c       | R757                   |                        | 0,13                   | 888,89                 | 0,01                     | 985,32                 | -0,15 |
| 28 | Cit_c + 2OG_m <=> Cit_m + 2OG_c   | R758                   |                        | 0,09                   | 920,73                 | 0,14                     | 876,27                 | 0,17  |
| 29 | 2OG_c + Succ_m <=> 2OG_m + Succ_c | R759                   |                        | -0,09                  | 914,24                 | -0,17                    | 851,64                 | -0,25 |
| 30 | Cit_c + Mal_m <=> Cit_m + Mal_c   | R760                   |                        | 0,24                   | 804,89                 | 0,00                     | 996,81                 | -0,37 |
| 31 | Cit_c + Succ_m <=> Cit_m + Succ_c | R761                   |                        | -0,01                  | 992,36                 | -0,03                    | 968,05                 | -0,07 |
| 32 | P_c <=> P_m                       | R762                   |                        | -11,92                 | 0,00                   | -10,20                   | 0,00                   | -4,18 |
| 33 | ATP_c + ADP_m <=> ATP_m + ADP_c   | R763                   |                        | 11,92                  | 0,00                   | 10,20                    | 0,00                   | 4,18  |
| 34 | Glu_c + Gaba_m <=> Glu_m + Gaba_c | R764                   |                        | 0,00                   | 0,00                   | 0,00                     | 0,00                   | 0,00  |
| 35 | CO2_c <=> CO2_m                   | R766                   |                        | 0,11                   | 0,00                   | -0,55                    | 0,00                   | -3,67 |
| 36 | O2_c <=> O2_m                     | R767                   |                        | 0,00                   | 0,00                   | 1,00                     | 0,00                   | 4,00  |
| 37 | NH3_c <=> NH3_m                   | R768                   |                        | -1,36                  | 421,40                 | -1,35                    | 422,22                 | -0,79 |
| 38 | AMP_c + ADP_m <=> AMP_m + ADP_c   | R769                   |                        | 6,55                   | 0,10                   | 7,22                     | 0,17                   | 8,78  |

Bereit

Figure 2: Fill data input template

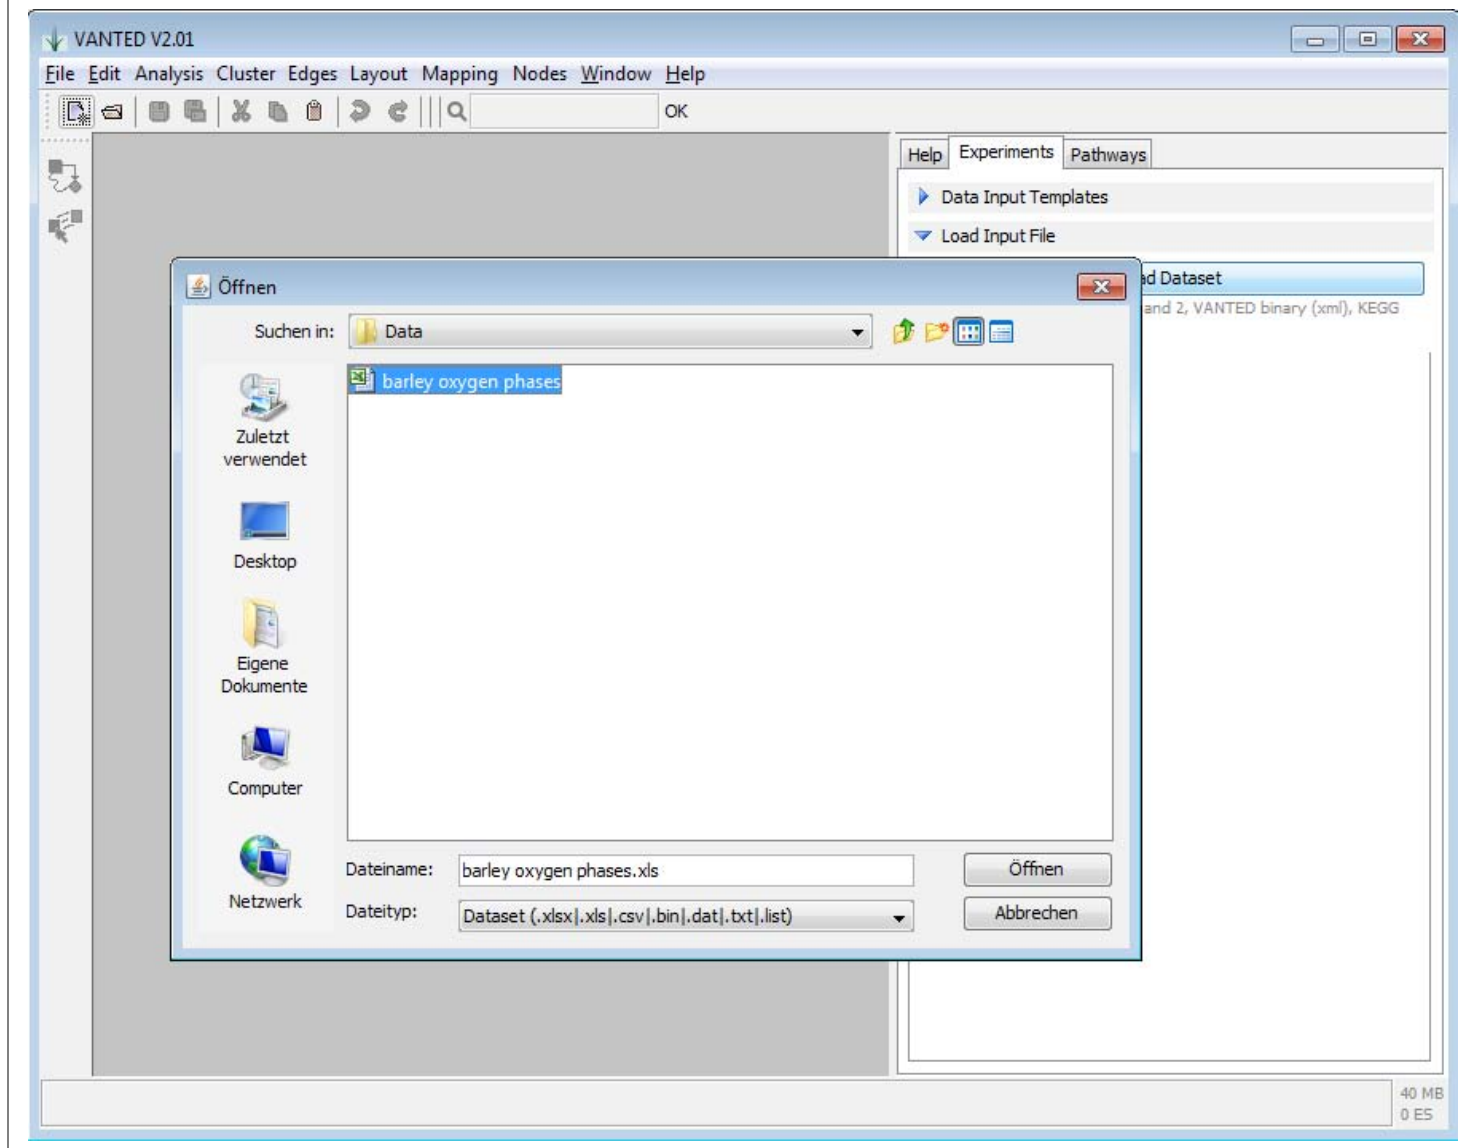

Figure 3: Load flux data

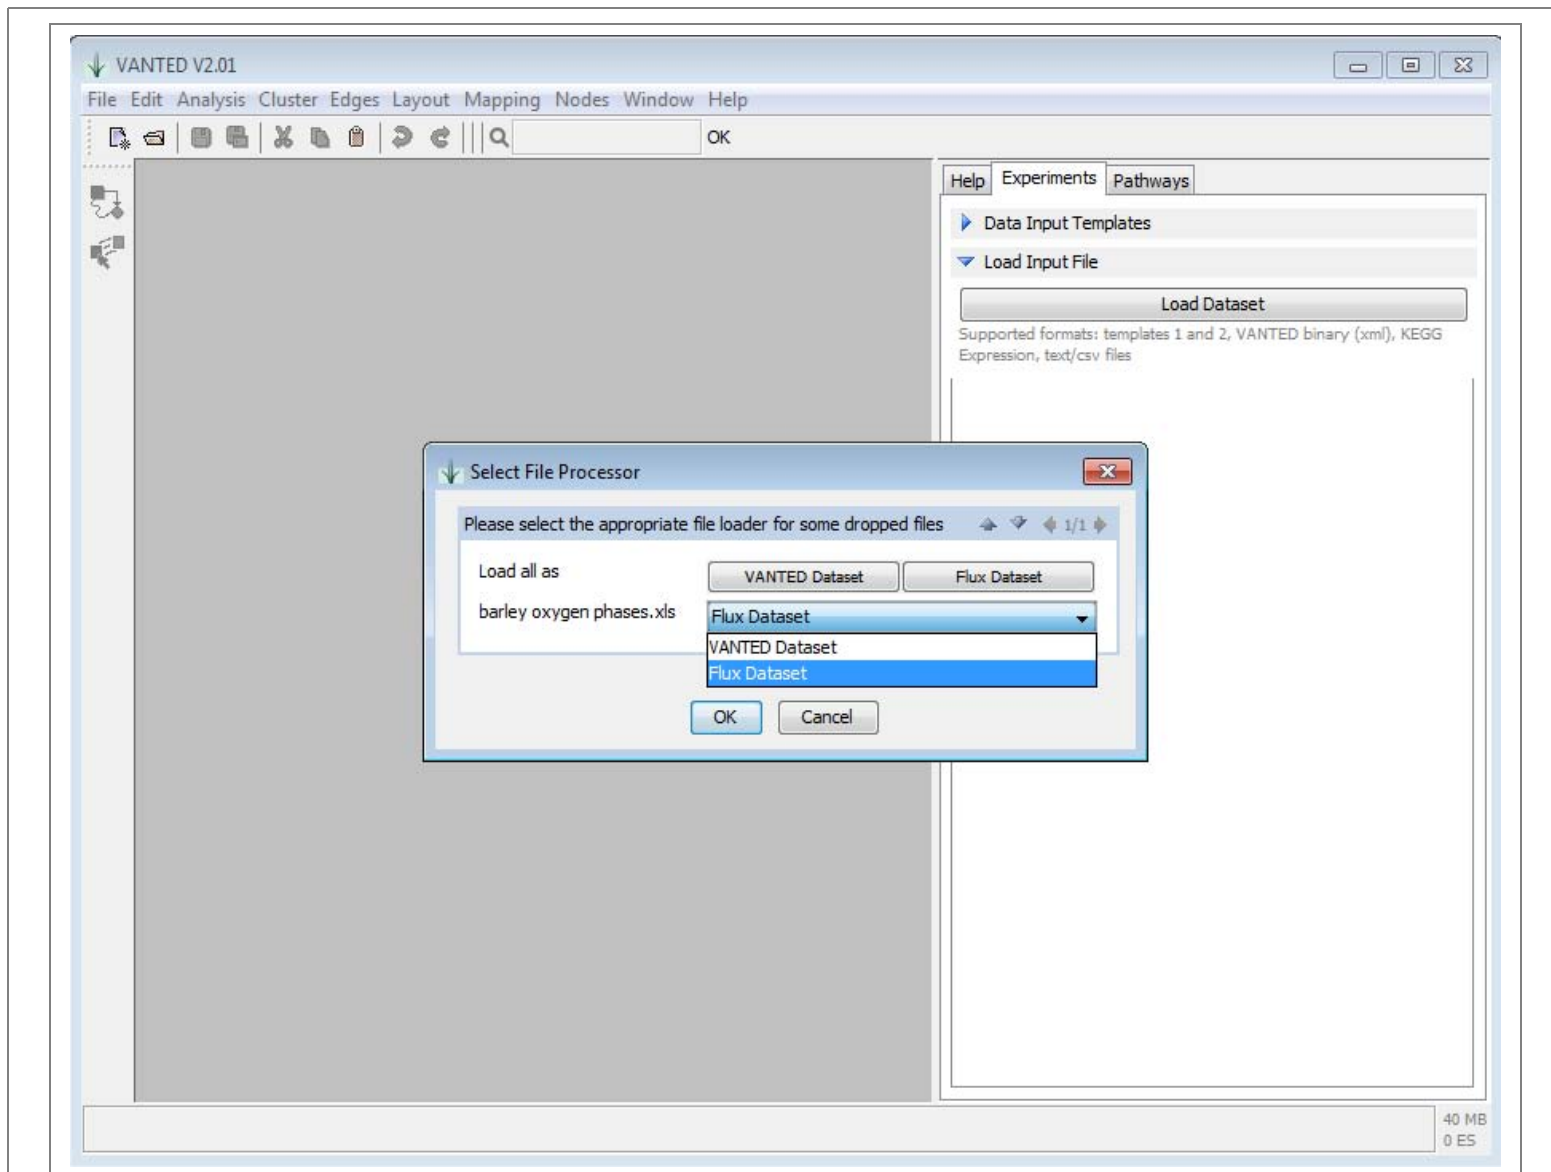

**Figure 4: Select correct template loader**

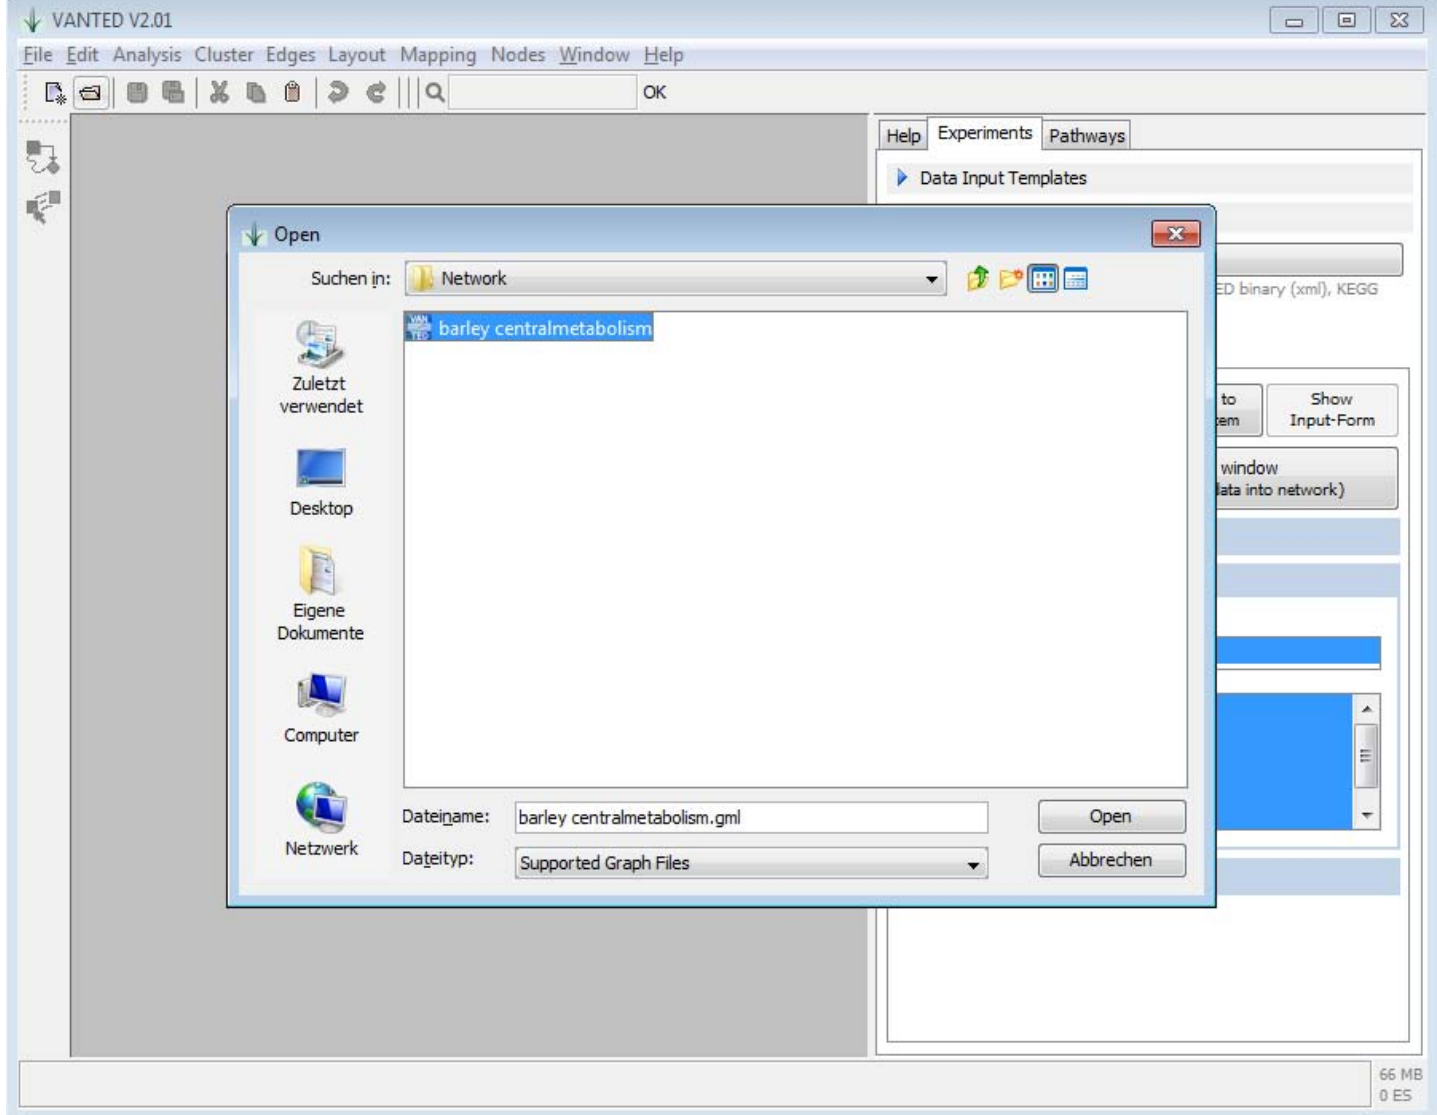

Figure 5: Load network

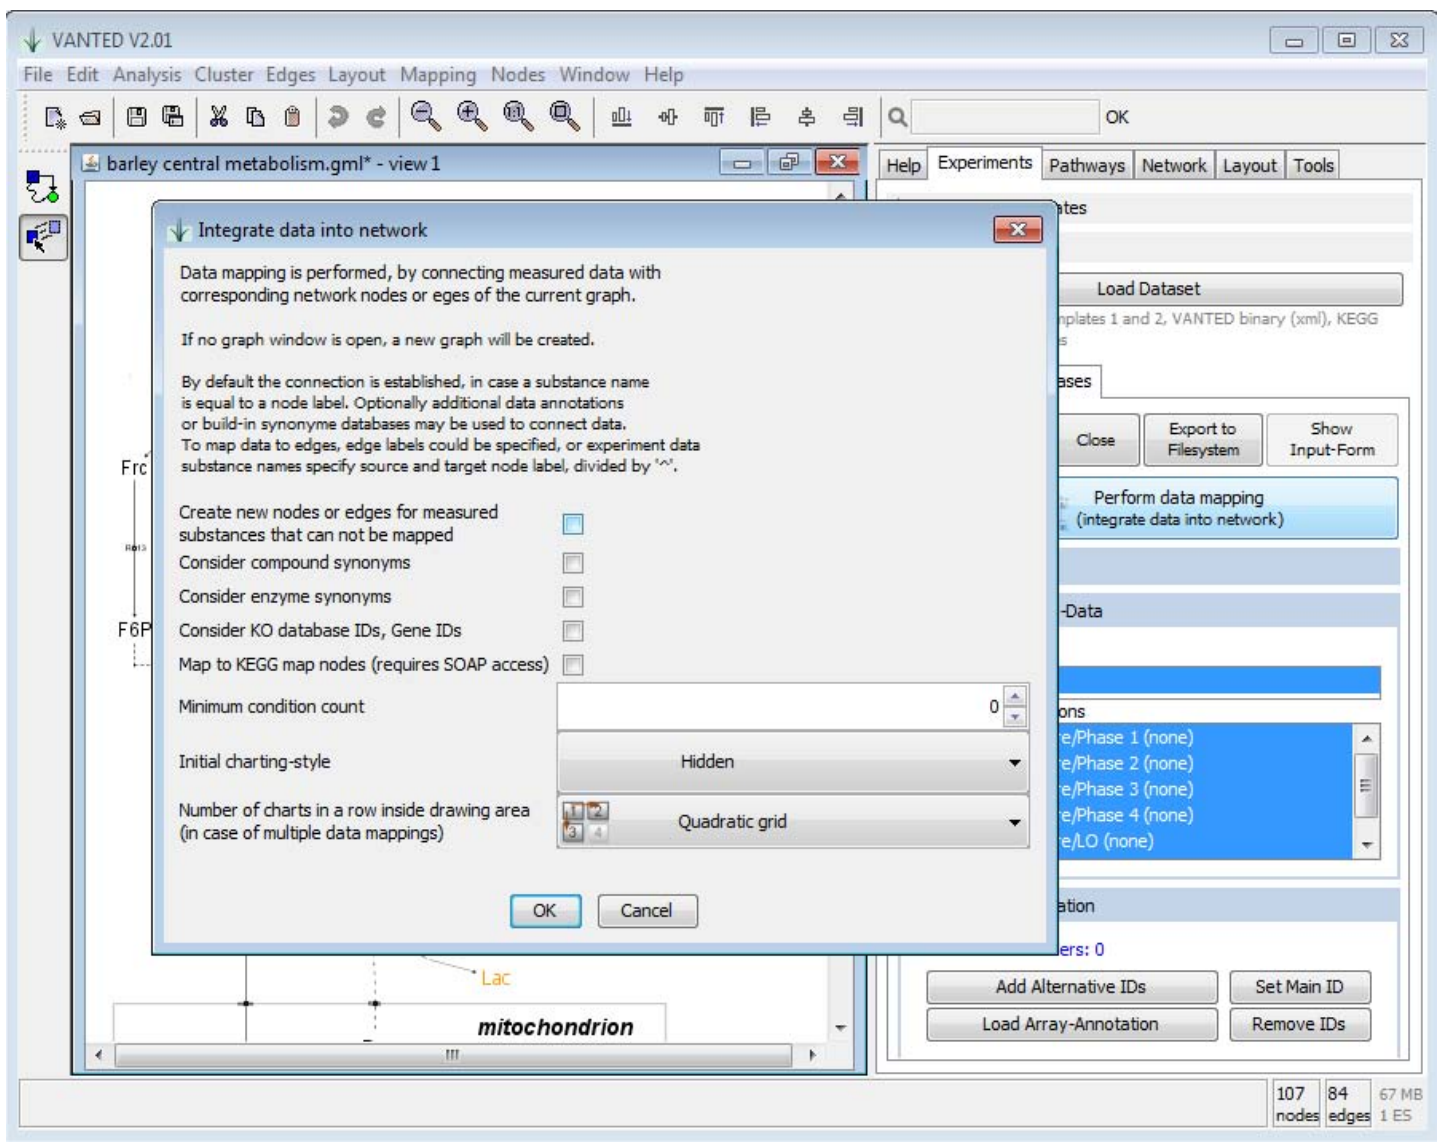

Figure 6: Map flux data onto network

VANTED V2.01

File Edit Analysis Cluster Edges Layout **Mapping** Nodes Window Help

barley central metabolism.gml\* - v

Help Experiments Pathways Network Layout Tools

Add Alternative Data Identifiers...  
 Create Condition Ratio View...  
 Create Legend  
 Extract Mapped Data  
 Merge Multiple Diagrams  
 Perform Statistical Analysis...  
 Remove Mapped Data  
 Self-Organizing Map (SOM)...  
 Substance Ratio Matrix...  
 Use Alternative Identifiers to...  
**Flux Visualisation**

cytosol  
 sucrose  
 Fruc  
 UDPGlc  
 B-gluc  
 AraX  
 Ce  
 F6P  
 G6P  
 G1P  
 F6P  
 G6P  
 F6P  
 G6P  
 3PG  
 PEP  
 CO<sub>2</sub>  
 CO<sub>2</sub>  
 Mal  
 OAA  
 Pyr  
 Eth  
 Lac  
 storage proteins  
 mitochondrion

Load Dataset  
 Supported formats: templates 1 and 2, VANTED binary (xml), KEGG Expression, text/csv files

Barley Oxygenic Phases

Close Export to Filesystem Show Input-Form

Perform data mapping (integrate data into network)

Experiment Info

Specify Mapping-Data

Time Points  
- not specified -

Genotypes/Conditions

- 1: Hordeum vulgare/Phase 1 (none)
- 2: Hordeum vulgare/Phase 2 (none)
- 3: Hordeum vulgare/Phase 3 (none)
- 4: Hordeum vulgare/Phase 4 (none)
- 5: Hordeum vulgare/LO (none)

Identifier Annotation

Alternative Identifiers: 0

Add Alternative IDs Set Main ID

Load Array-Annotation Remove IDs

107 nodes 72/84 edges selected 67 MB 1 ES

Figure 7: Summon FluxMap dialog

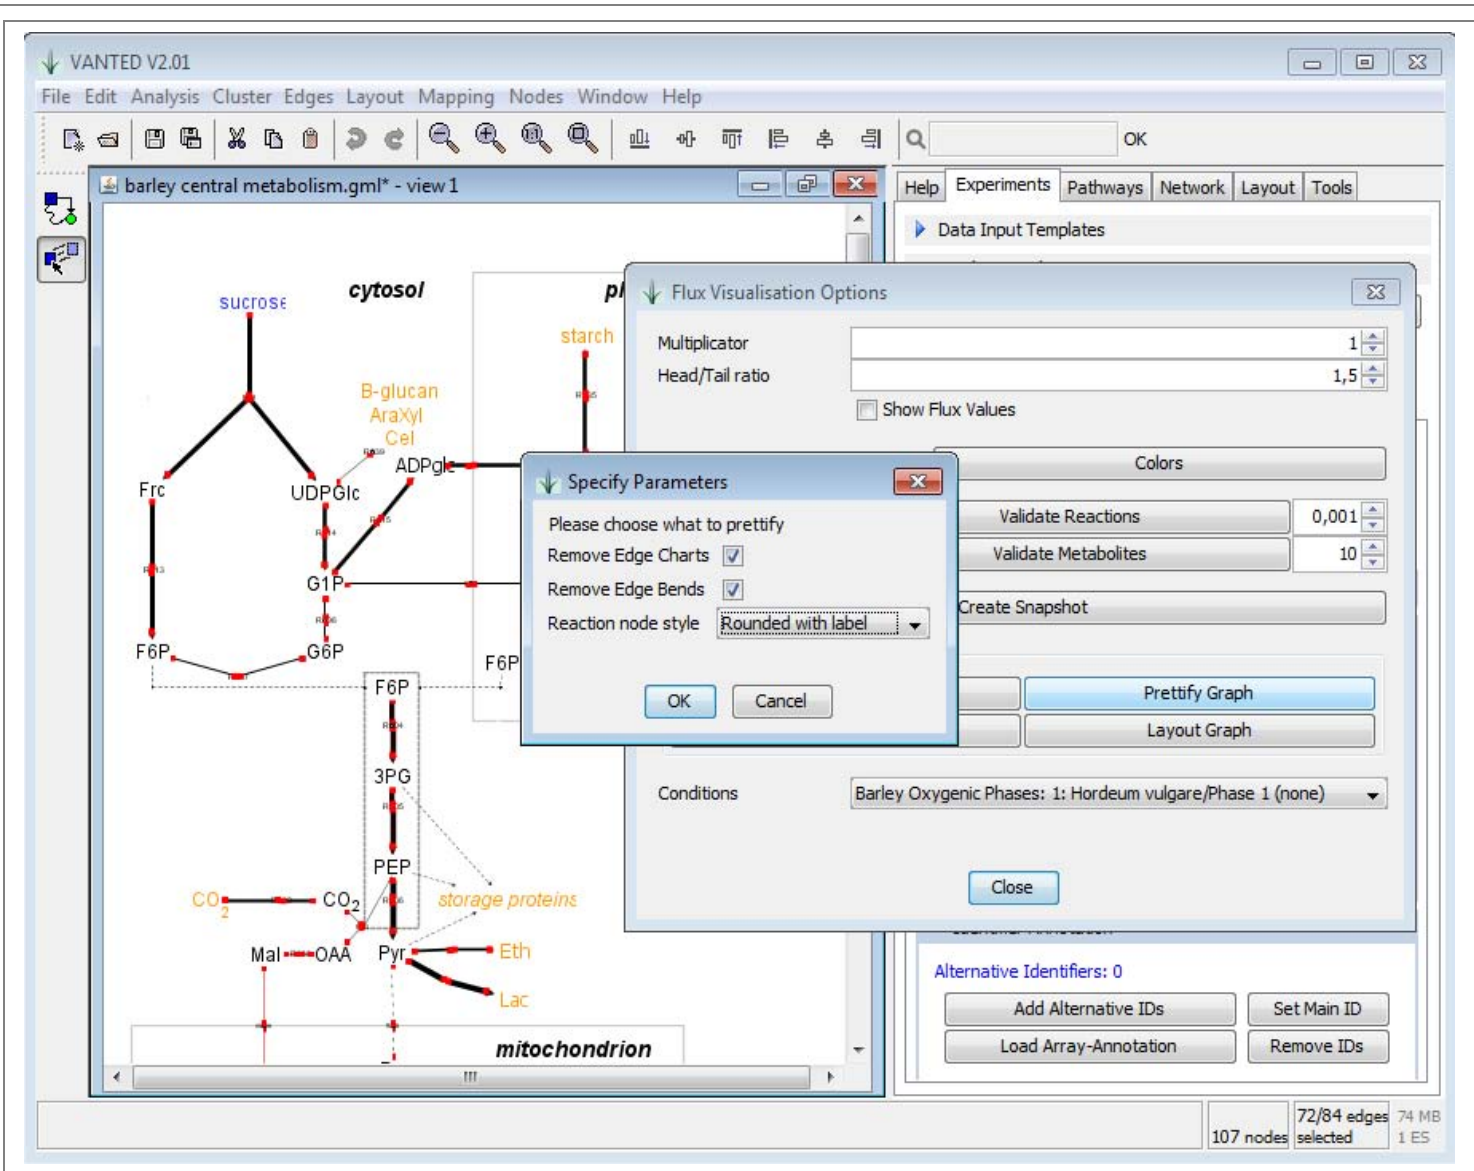

Figure 8: Improve visualization



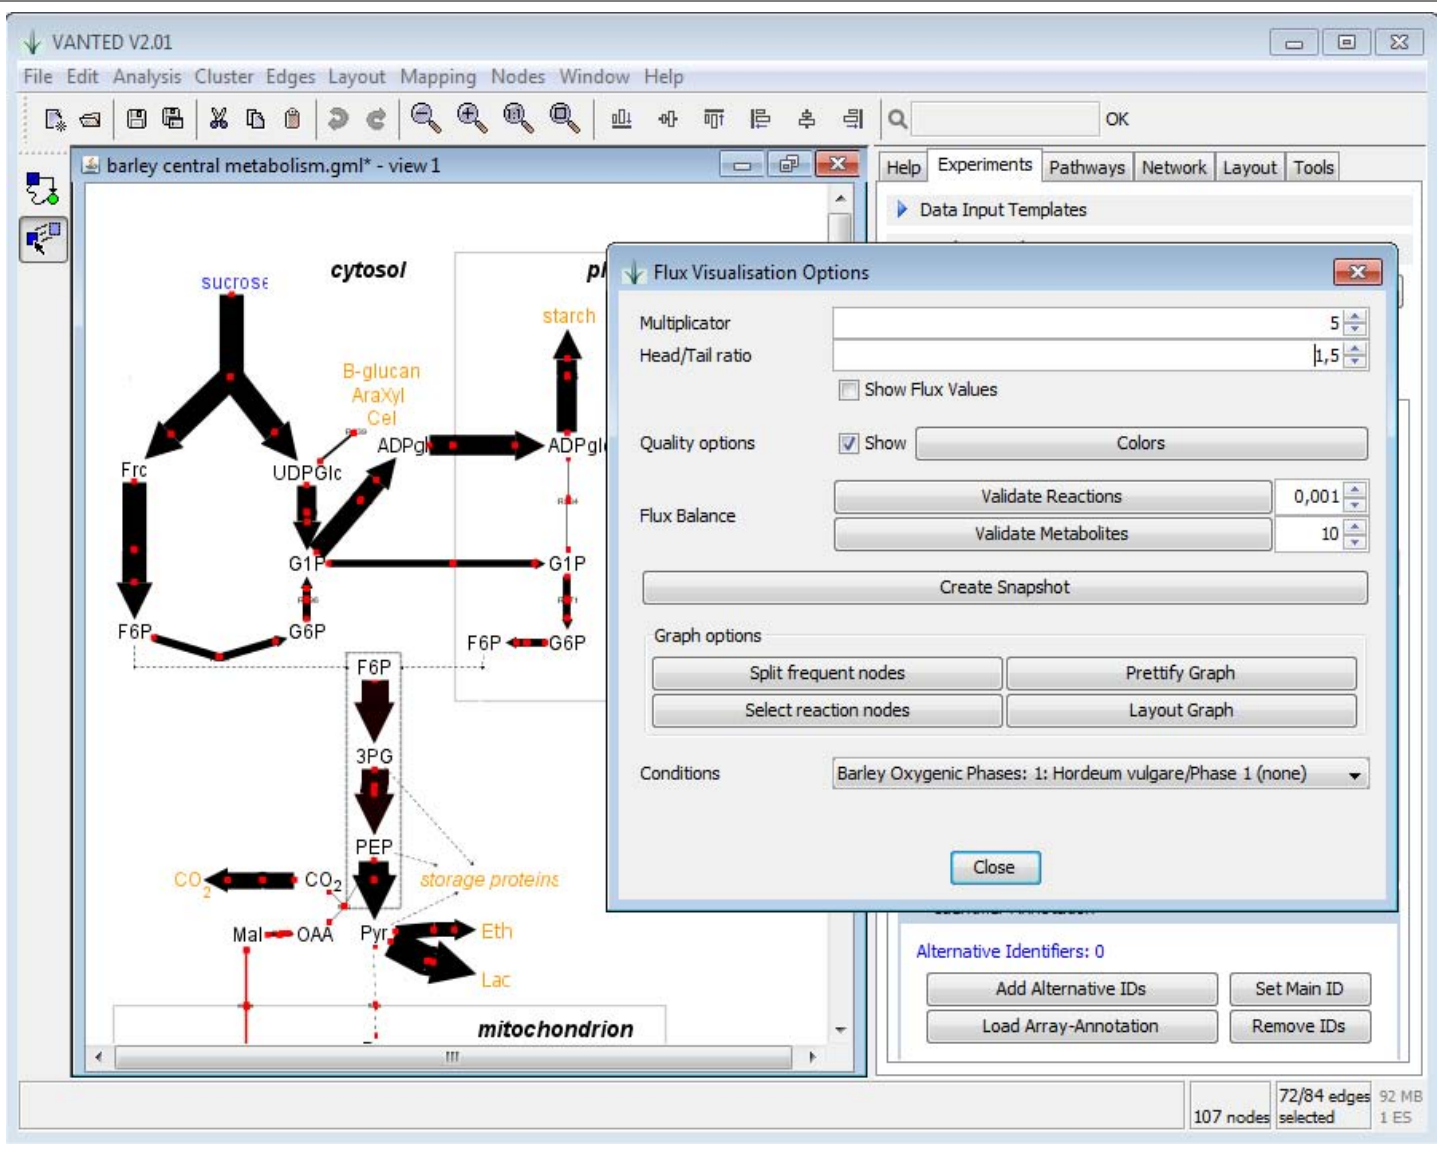

Figure 9: Increase global edge thickness

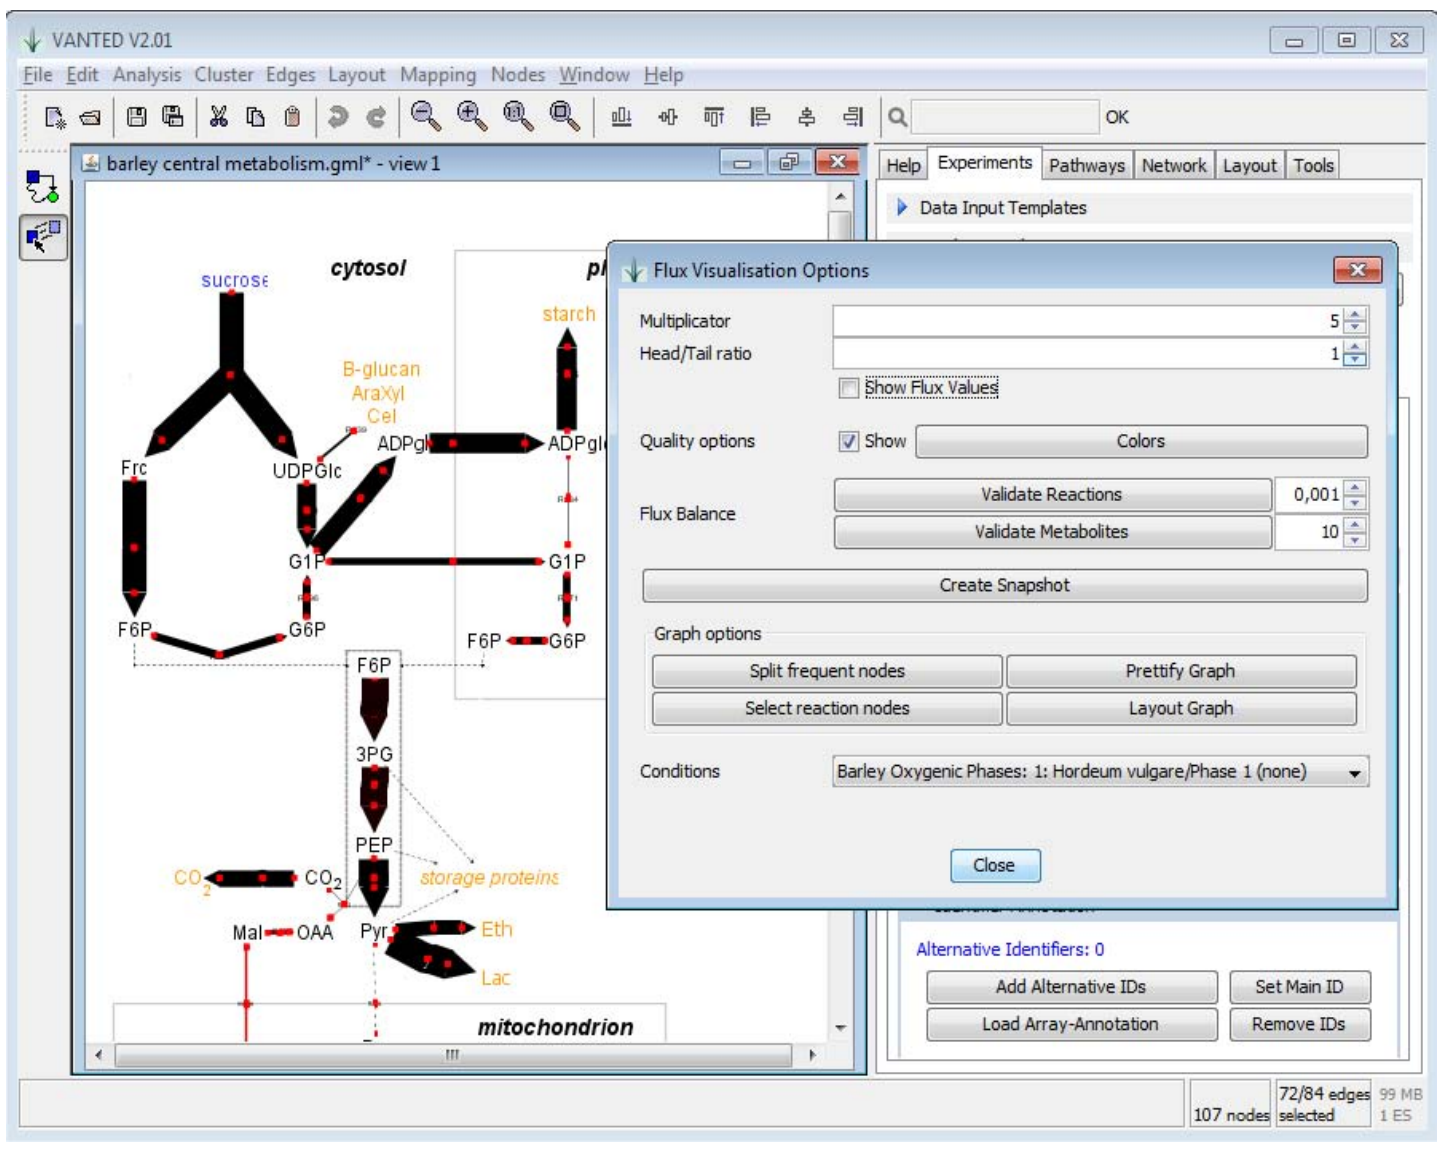

Figure 10: Reduce arrowhead/-tail ratio

VANTED V2.01

File Edit Analysis Cluster Edges Layout Mapping Nodes Window Help

barley central metabolism.gml\* - view 1

Help Experiments Pathways Network Layout Tools

Data Input Templates

**Flux Visualisation Options**

Multiplicator: 5

Head/Tail ratio: 1

Show Flux Values

Quality options:  Show Colors

Flux Balance: Validate Reactions: 0,001; Validate Metabolites: 10

Create Snapshot

Graph options: Split frequent nodes; Prettify Graph; Select reaction nodes; Layout Graph

Conditions: Barley Oxygenic Phases: 3: Hordeum vulgare/Phase 3 (none)

- Barley Oxygenic Phases: 1: Hordeum vulgare/Phase 1 (none)
- Barley Oxygenic Phases: 2: Hordeum vulgare/Phase 2 (none)
- Barley Oxygenic Phases: 3: Hordeum vulgare/Phase 3 (none)
- Barley Oxygenic Phases: 4: Hordeum vulgare/Phase 4 (none)
- Barley Oxygenic Phases: 5: Hordeum vulgare/LO (none)
- Barley Oxygenic Phases: 6: Hordeum vulgare/Phase 5 (none)

Alternative identifiers: u

Add Alternative IDs; Set Main ID; Load Array-Annotation; Remove IDs

107 nodes; 84 edges; 87 MB; 1 ES

Figure 11: Switch between different conditions

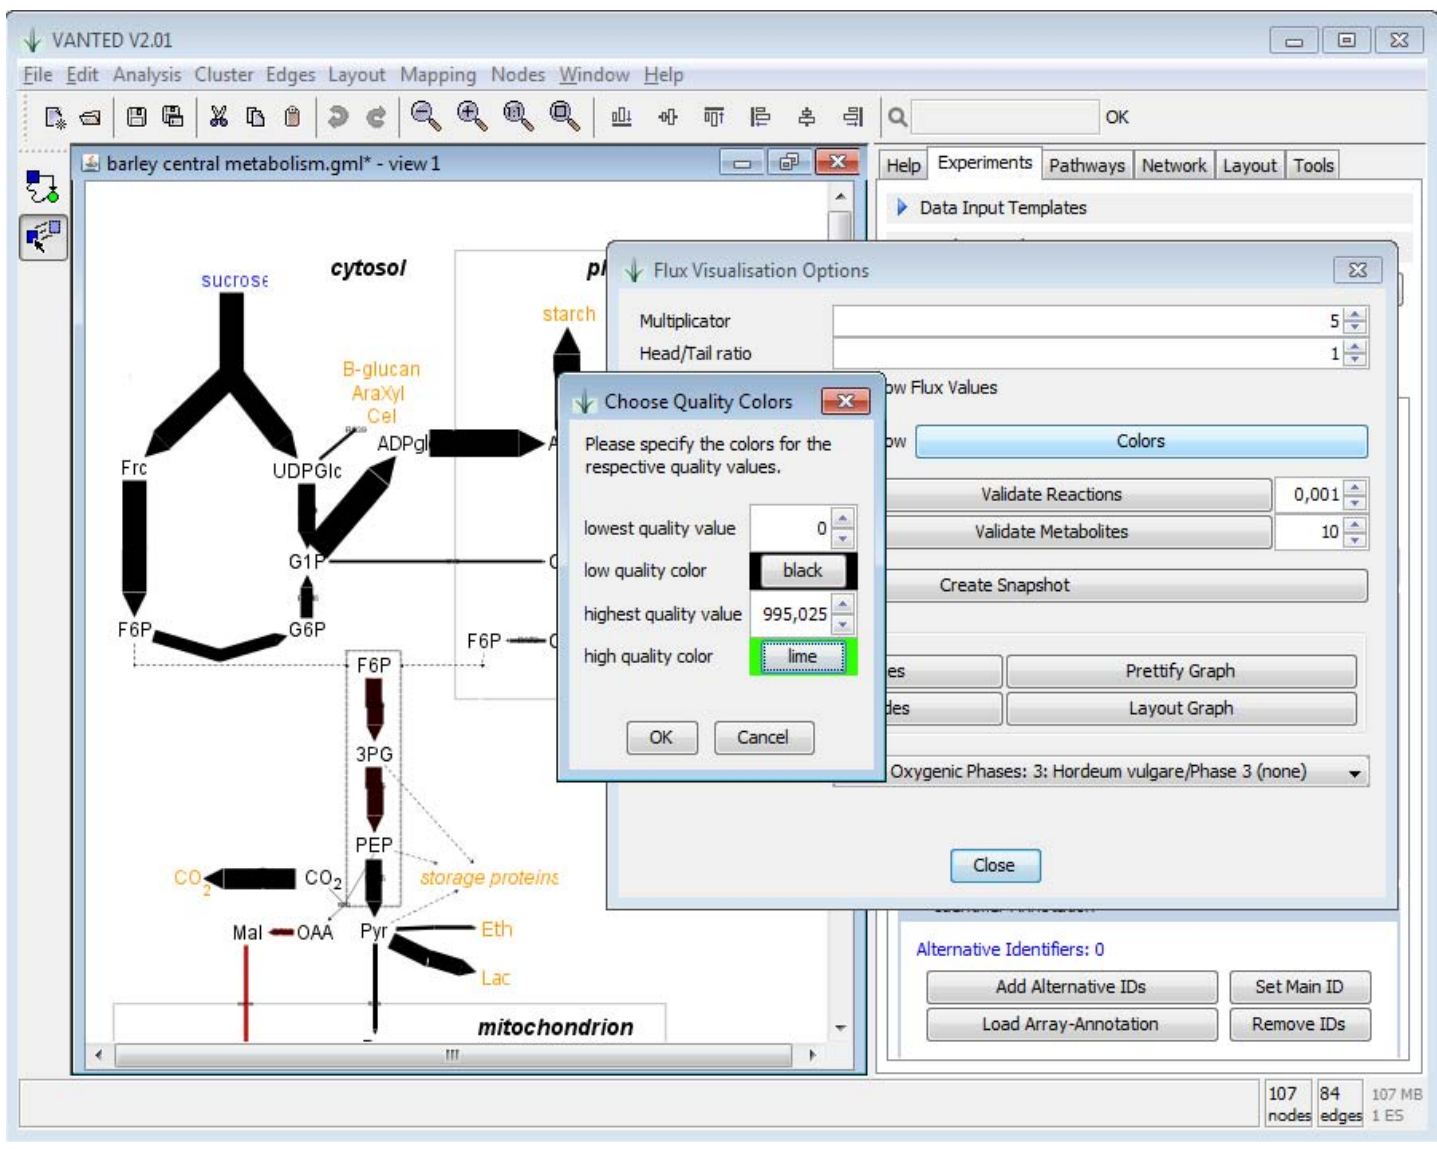

Figure 12: Adapt visualization of quality information

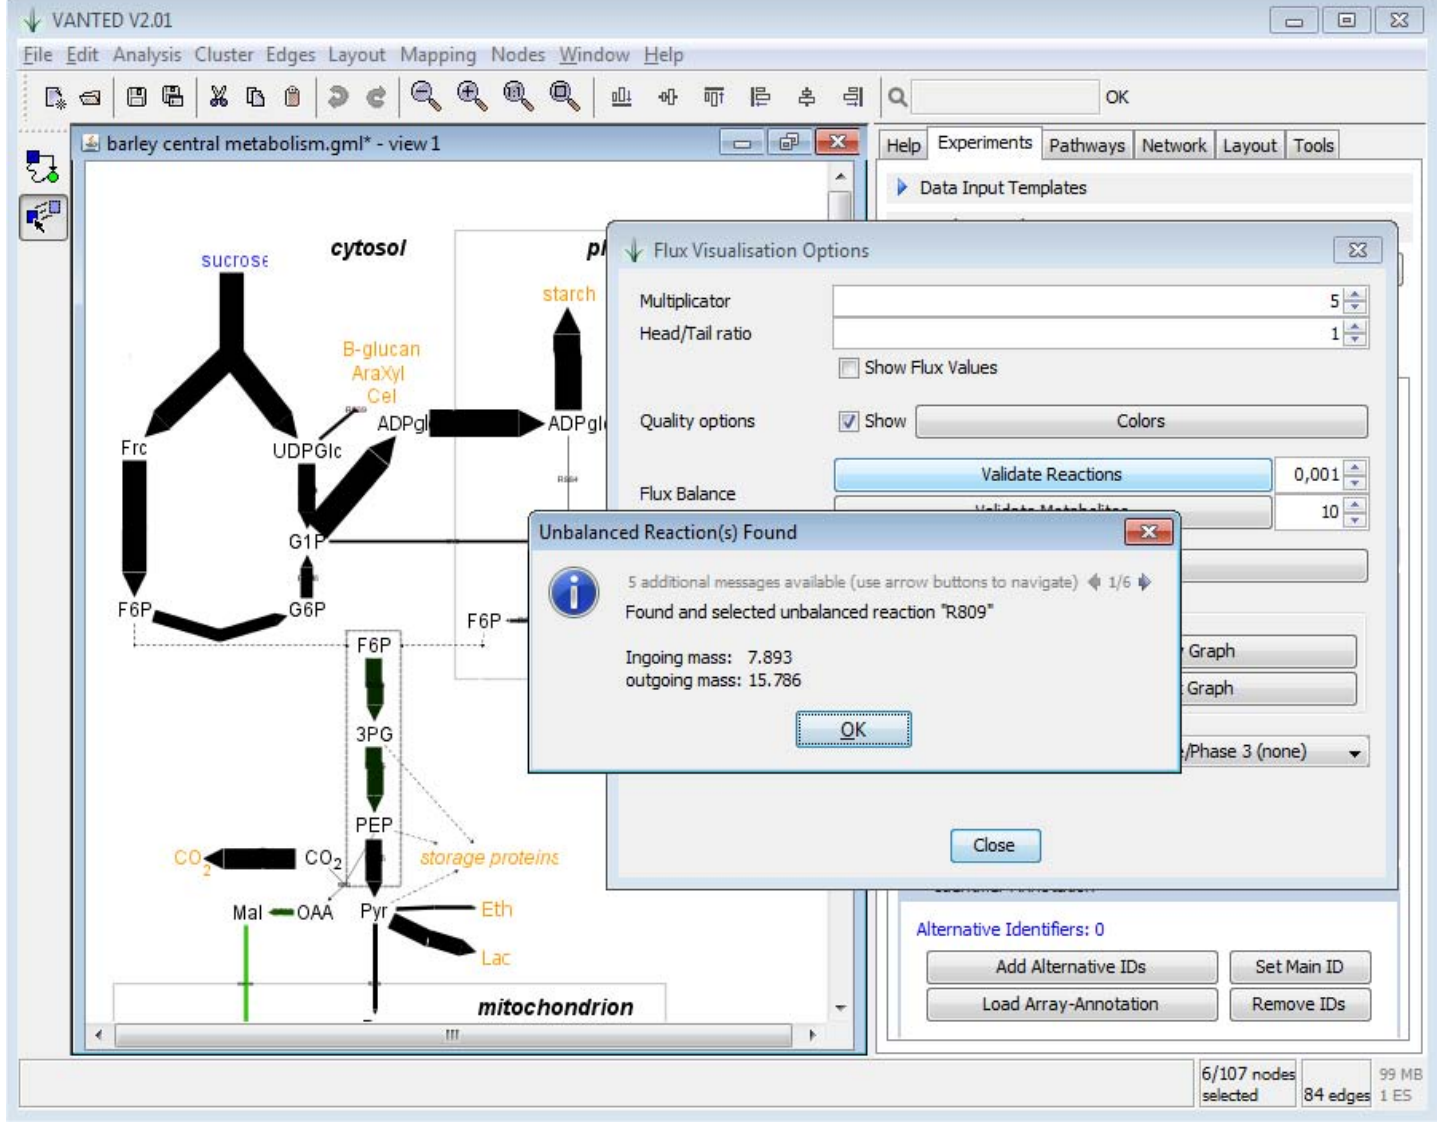

Figure 13: Validate flux balance

The screenshot displays the VANTED V2.01 interface. The main window shows a metabolic pathway diagram with nodes like starch, ADP-gl, G1P, G6P, CO<sub>2</sub>, PEP, Mal, OAA, Pyr, Eth, and Lac. A 'mitochondrion' is also indicated. The File menu is open, showing options like New, Open, Save, and Export Data... The Flux Visualisation Options dialog box is open, showing settings for Multiplicator (5), Head/Tail ratio (1), Show Flux Values (unchecked), Show Colors (checked), Validate Reactions (0,001), and Validate Metabolites (10). The dialog also includes buttons for Create Snapshot, Split frequent nodes, Prettify Graph, Select reaction nodes, and Layout Graph. The Conditions dropdown is set to 'Barley Oxygenic Phases: 3: Hordeum vulgare/Phase 3 (none)'. The status bar at the bottom shows 6/107 nodes selected, 84 edges, and 108 MB of memory used.

Figure 14: Export data, graphics or webpage

VANTED V2.01

File Edit Analysis Cluster Edges Layout Mapping Nodes Window Help

barley central metabolism.gml\* - view 1

Help Experiments Pathways Network Layout Tools

Data Input Templates

Flux Values

Colors

Validate Reactions 0,001

Validate Metabolites 10

Create Snapshot

Prettify Graph

Layout Graph

Oxygenic Phases: 3: Hordeum vulgare/Phase 3 (none)

Alternative Identifiers: 0

Add Alternative IDs Set Main ID

Load Array-Annotation Remove IDs

6/107 nodes selected 84 edges 80 MB 1 ES

**cytosol**

sucrose

B-glucan  
AraXyl  
Cel

ADPGlc

UDPGlc

G1P

F6P

G6P

F6P

F6P

CO<sub>2</sub>

CO<sub>2</sub>

Mal

OAA

Pyr

Eth

Lac

storage prote

**mitochondrion**

**Create Image File**

Select the command to be executed:

Create JPG image

Create PNG image

Create SVG image

Create PDF image

Create PPT file

Click to execute algorithm, dialog will be closed afterwards.

Close

Figure 15: Export in different graphical formats

VANTED V2.01

File Edit Analysis Cluster Edges Layout Mapping Nodes Window Help

barley central metabolism.gml\* - view 1

Help Experiments Pathways Network Layout Tools

Data Input Templates

**Flux Visualisation Options**

Multiplicator: 5

Head/Tail ratio: 1

Show Flux Values

Quality options:  Show Colors

Flux Balance: Validate Reactions: 0,001; Validate Metabolites: 10

Create Snapshot

Graph options: Split frequent nodes; Prettify Graph; Select reaction nodes; Layout Graph

Key Oxygenic Phases: 3: Hordeum vulgare/Phase 3 (none)

Close

Alternative Identifiers: 0

Add Alternative IDs; Set Main ID; Load Array-Annotation; Remove IDs

1/107 nodes selected; 84 edges; 112 MB; 1 ES

F6P\_c  
Degree: 3, F6P is connected to: [n/a], [n/a], R804

Figure 16: Connect metabolites with the same label



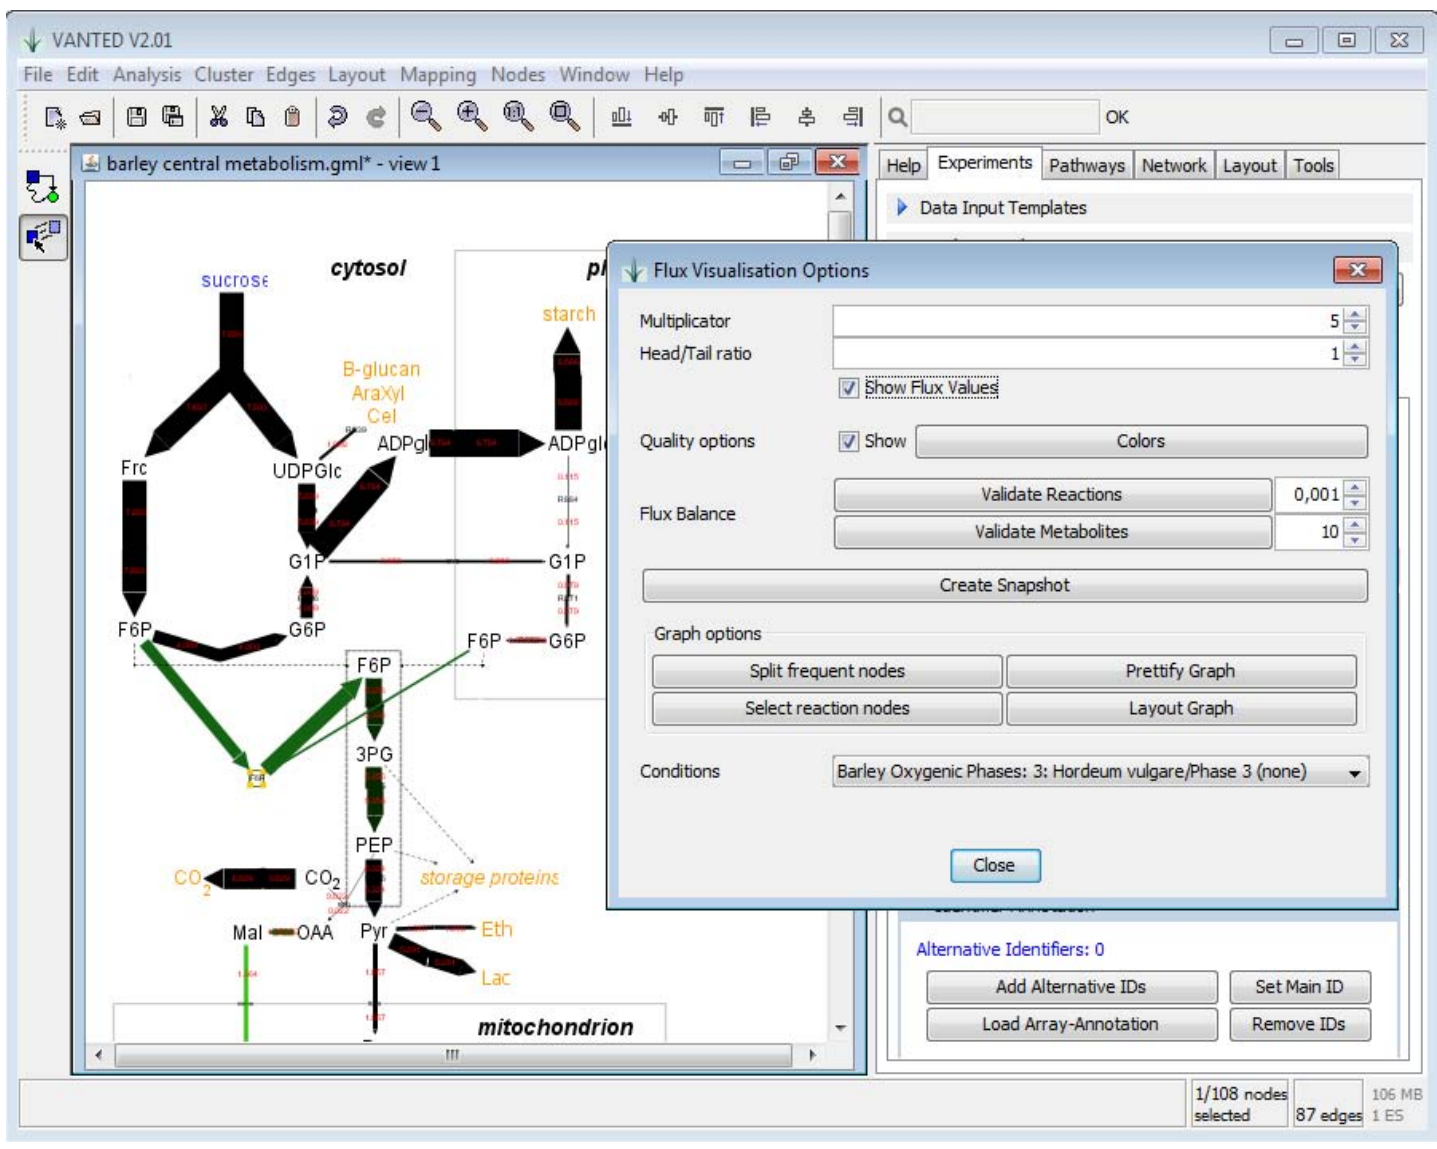

Figure 17: Show flux values on edges
